# Supplementary material for: Radiotherapy for Clinically Localized T3b or T4 Very-High-Risk Prostate Cancer-Role of Dose Escalation Using High-Dose-Rate Brachytherapy Boost or High Dose Intensity Modulated Radiotherapy
Source: MDPI journal article supplement (doi:10.3390/cancers13081856), 2021-04-13
Supplement: s1 [file s1]

## Supplementary Materials:

# Radiotherapy for Clinically Localized T3b or T4 Very-High-Risk Prostate Cancer-Role of Dose Escalation Using High-Dose-Rate Brachytherapy Boost or High Dose Intensity Modulated Radiotherapy

Hideya Yamazaki, Gen Suzuki, Koji Masui, Norihiro Aibe, Daisuke Shimizu, Takuya Kimoto, Daisuke Shimizu, Ken Yoshida, Satoaki Nakamura and Haruumi Okabe

Table S1. Patients characteristics among three groups.

| Variables                    | Strata   | Conv. EBRT<br>(n = 86)   |       | High dose EBRT (n = 39)  |      | HDR boost<br>(n = 124)   |      | p - value |
|------------------------------|----------|--------------------------|-------|--------------------------|------|--------------------------|------|-----------|
|                              |          | No. or<br>Median (range) | (%)   | No. or<br>Median (range) | (%)  | No. or<br>Median (range) | (%)  |           |
| Age                          |          | 70.5 (60–89)             |       | 73 (64–79)               |      | 71 (60–86)               |      | 0.2262    |
| T category                   | 3b       | 67                       | -78%  | 34                       | -87% | 115                      | -93% | 0.0077    |
|                              | 4        | 19                       | -22%  | 5                        | -13% | 9                        | -7%  |           |
| iPSA                         | (ng/mL)  | 42.07 (3.4–398)          |       | 27.2 (4.7–240)           |      | 31.9 (4.73–486)          |      | 0.3398    |
| Gleason score                | -6       | 0                        | 0%    | 4                        | -10% | 9                        | -7%  | 0.0383    |
|                              | 7        | 34                       | -40%  | 11                       | -28% | 53                       | -43% |           |
|                              | 8-       | 51                       | -59%  | 24                       | -62% | 62                       | -50% |           |
| Prescribed dose<br>(EQD 2Gy) | (Gy)     | 72 (70–72)               |       | 78 (74–80)               |      | 108.7 (104.1–129.8)      |      | <0.0001   |
| Hormonal therapy             | Yes      | 86                       | -100% | 38                       | -97% | 121                      | -98% | 0.3415    |
| Neoadjuvant                  | months   | 7.5 (2–18)               |       | 6.5 (5–14)               |      | 12 (1–74)                |      | <0.0001   |
| Adjuvant                     | months   | 20 (1–30)                |       | 23 (3–60)                |      | 36 (8–114)               |      | <0.0001   |
|                              | No       | 0                        | 0%    | 1                        | -3%  | 3                        | -2%  |           |
| Follow-up                    | (Months) | 77.5 (18.7–135)          |       | 62.76 (24–87)            |      | 64 (13–153)              |      | 0.0002    |

**Table S2.** Detailed BED and EQD2Gy for each treatment schedule.

| Prescribed dose                  | PT No. | (%)   | BED( $\alpha/\beta=1.5\text{Gy}$ ) | (EQD 2Gy) |
|----------------------------------|--------|-------|------------------------------------|-----------|
| Conv. EBRT (n=86)                |        |       |                                    |           |
| 70Gy/35fr                        | 14     | (16%) | 163                                | 70        |
| 72Gy/36fr                        | 72     | (84%) | 168                                | 72        |
| High dose EBRT (n=39)            |        |       |                                    |           |
| 74 Gy/36fr                       | 12     | (31%) | 172                                | 74        |
| 78Gy/39fr                        | 14     | (36%) | 182                                | 78        |
| 74.8Gy/34fr                      | 8      | (21%) | 184                                | 79        |
| 80Gy/40fr                        | 4      | (10%) | 186                                | 80        |
| 70Gy/28fr                        | 1      | (3%)  | 186                                | 80        |
| HDR boost (n = 124)              |        |       |                                    |           |
| 18 Gy / 2 fr +EBRT 39 Gy /13 fr  | 10     | (8%)  | 243                                | 104       |
| 18 Gy / 2 fr +51 Gy / 17fr       | 14     | (11%) | 279                                | 119       |
| 18 Gy / 2 fr + 48 Gy/16fr        | 1      | (1%)  | 270                                | 115       |
| 20 Gy / 2fr + EBRT46Gy /23fr     | 4      | (3%)  | 260                                | 111       |
| 21 Gy /2 fr + EBRT 45 Gy /15fr   | 4      | (3%)  | 303                                | 130       |
| 21Gy / 3fr+ EBRT 51 Gy / 17 fr   | 1      | (1%)  | 272                                | 116       |
| 31.5 Gy / 5fr + EBRT 30 Gy /10fr | 90     | (73%) | 253                                | 109       |

$\text{BED} = n \times d \times (1 + d/(\alpha/\beta))$  ;  $(\alpha/\beta=1.5\text{ Gy}$ ,  $n$ =fraction number,  $d$  = single dose).

$\text{EQD } 2\text{Gy} = n \times d \times (\alpha/\beta + d)/(\alpha/\beta + 2)$ .

**Table S3.** Acute toxicity among three groups.

| Toxicities       | Grade | Conv EBRT. (n = 86) |      | HDEBRT (n = 39) |      | HDR boost (n = 124) |      | p-value |
|------------------|-------|---------------------|------|-----------------|------|---------------------|------|---------|
|                  |       | No.                 | (%)  | No.             | (%)  | No.                 | (%)  |         |
| Genitourinary    | 0     | 33                  | -38% | 26              | -67% | 36                  | -29% | <0.0001 |
|                  | 1     | 48                  | -56% | 9               | -23% | 66                  | -53% |         |
|                  | 2     | 5                   | -6%  | 4               | -10% | 22                  | -18% |         |
|                  | 3     | 0                   | 0%   | 0               | 0%   | 0                   | 0%   |         |
| Gastrointestinal | 0     | 45                  | -52% | 37              | -95% | 113                 | -91% | <0.0001 |
|                  | 1     | 40                  | -47% | 2               | -5%  | 11                  | -9%  |         |
|                  | 2     | 1                   | -1%  | 0               | 0%   | 0                   | 0%   |         |
|                  | 3     | 0                   | 0%   | 0               | 0%   | 0                   | 0%   |         |

**Table S4.** Late toxicity among three groups.

| Toxicities       | Grade | Conv EBRT. (n = 86) |      | HDEBRT (n = 39) |      | HDR boost (n = 124) |      | p-value |
|------------------|-------|---------------------|------|-----------------|------|---------------------|------|---------|
|                  |       | No.                 | (%)  | No.             | (%)  | No.                 | (%)  |         |
| Genitourinary    | 0     | 69                  | -80% | 36              | -92% | 56                  | -45% | <0.0001 |
|                  | 1     | 8                   | -9%  | 1               | -3%  | 54                  | -44% |         |
|                  | 2     | 5                   | -6%  | 2               | -5%  | 7                   | -6%  |         |
|                  | 3     | 4                   | -5%  | 0               | 0%   | 7                   | -6%  |         |
| Gastrointestinal | 0     | 65                  | -76% | 35              | -90% | 110                 | -89% | 0.0741  |
|                  | 1     | 18                  | -21% | 2               | -5%  | 12                  | -10% |         |
|                  | 2     | 1                   | -1%  | 2               | -5%  | 1                   | -1%  |         |
|                  | 3     | 1                   | -1%  | 0               | 0%   | 1                   | -1%  |         |
